# Supplementary material for: Characterization, Concentration, and Speciation of Metal Elements in Copper Slag: Implications for Secondary Metal Recovery
Source: MDPI journal article supplement (doi:10.3390/cryst14050420), 2024-04-29
Supplement: s1 [file s1]

Supporting material

# Characterization, Concentration, and Speciation of Metal Elements in Copper Slag: Implications for Secondary Metal Recovery

Zirou Liu <sup>1</sup>, Xinhang Xu <sup>1</sup>, Li Guo <sup>1</sup>, Qiusong Chen <sup>1</sup> and Chongchong Qi <sup>1,2,\*</sup>

<sup>1</sup> School of Resources and Safety Engineering, Central South University, Changsha 410083, China; liuziroustudy@gmail.com (Z.L.); x578817460@163.com (X.X.); llguo98@163.com (L.G.); qiusong.chen@csu.edu.cn (Q.C.)

<sup>2</sup> School of Metallurgy and Environment, Central South University, Changsha 410083, China

\* Correspondence: chongchong.qi@csu.edu.cn

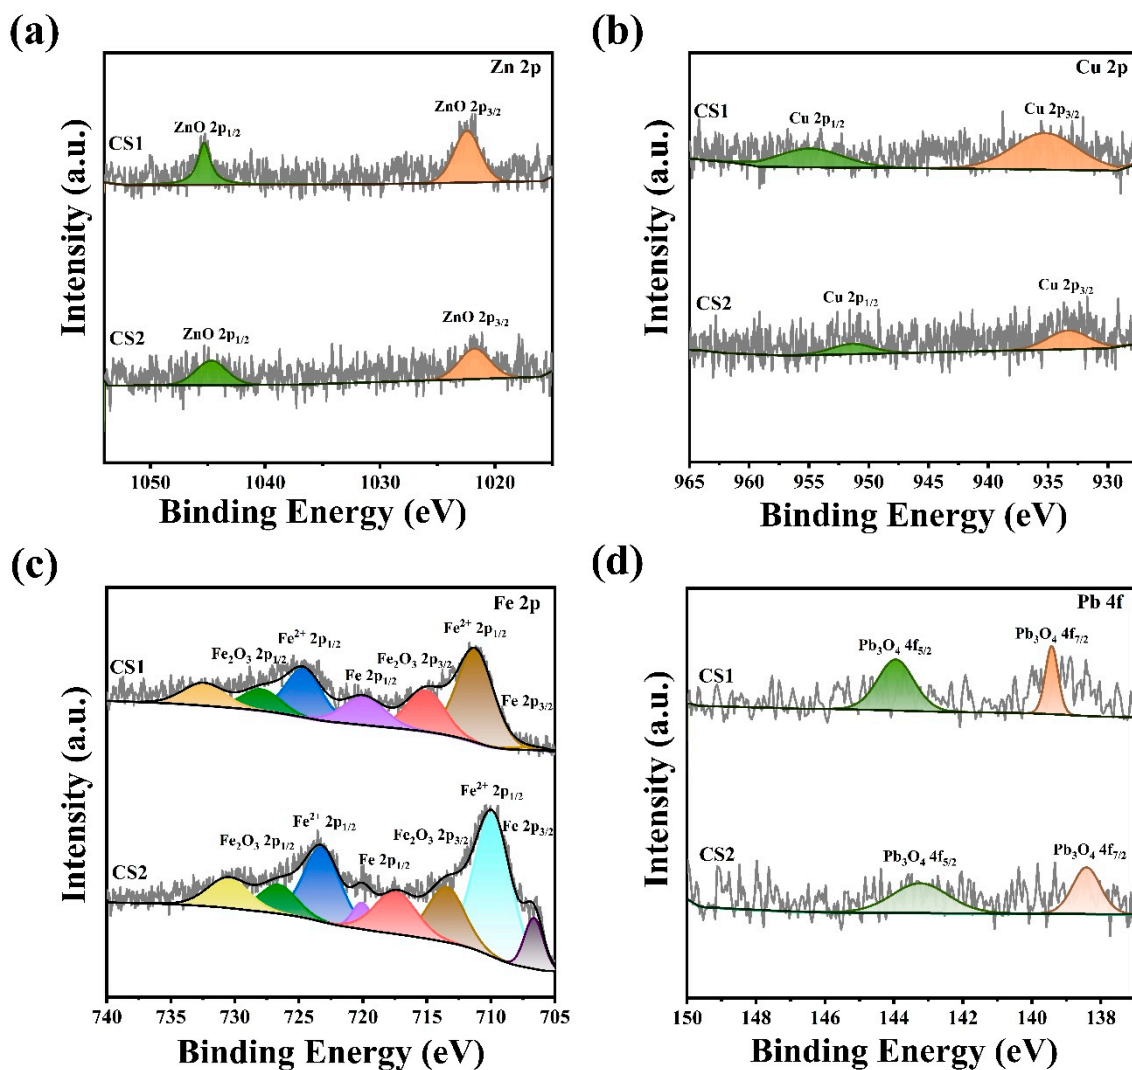

Figure S1. Fine scan XPS spectra of copper slag samples at the etching time of 0 s :

(a) Zn 2p, (b) Cu 2p, (c) Fe 2p, and (d) Pb 4f. The gray line shows the experimental values. The black line shows the fitted values of CS1 and CS2.

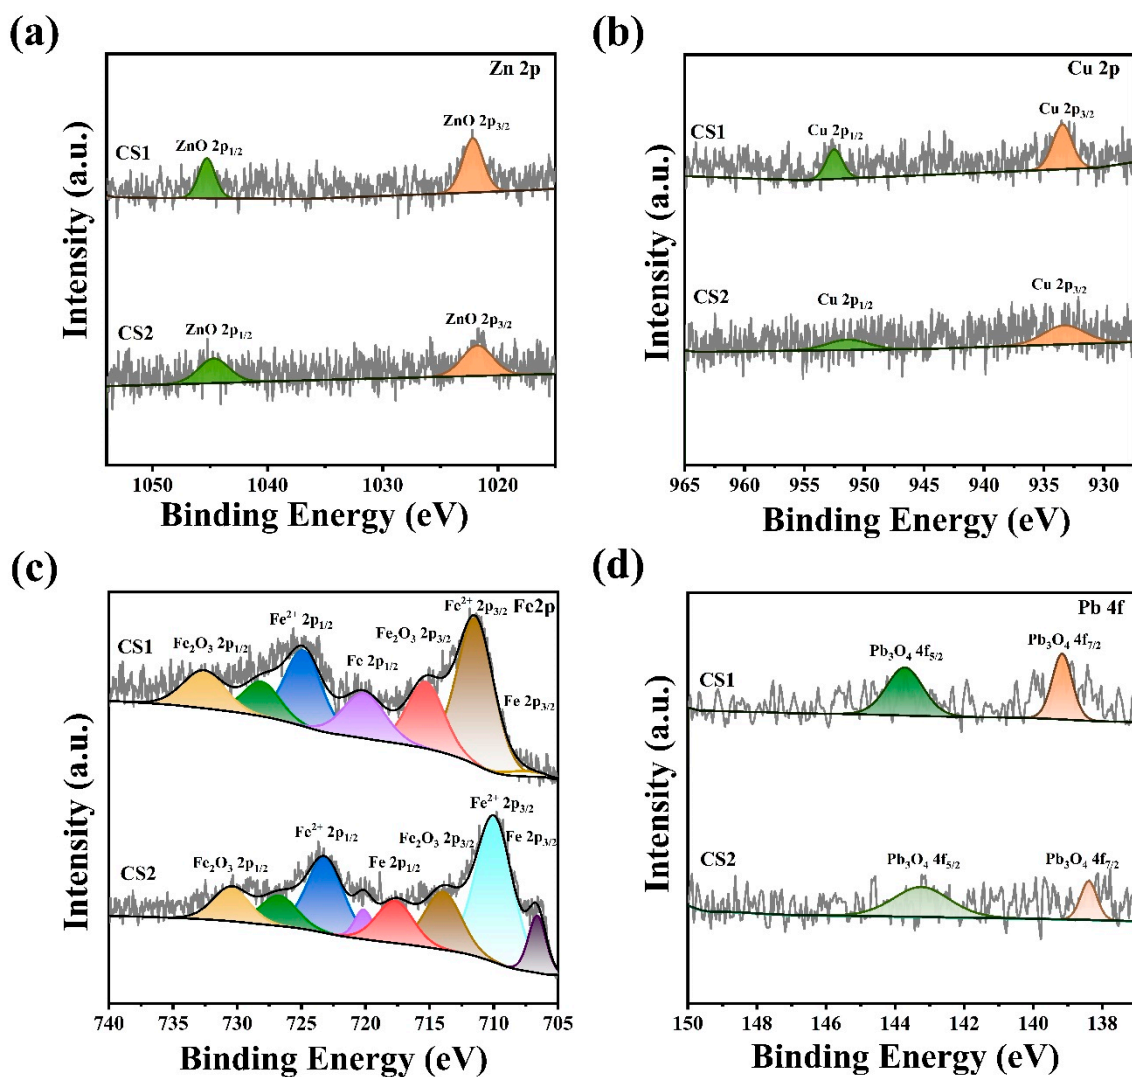

Figure S2. Fine scan XPS spectra of copper slag samples at the etching time of 100 s :

(a) Zn 2p, (b) Cu 2p, (c) Fe 2p, and (d) Pb 4f. The gray line shows the experimental values. The black line shows the fitted values of CS1 and CS2.

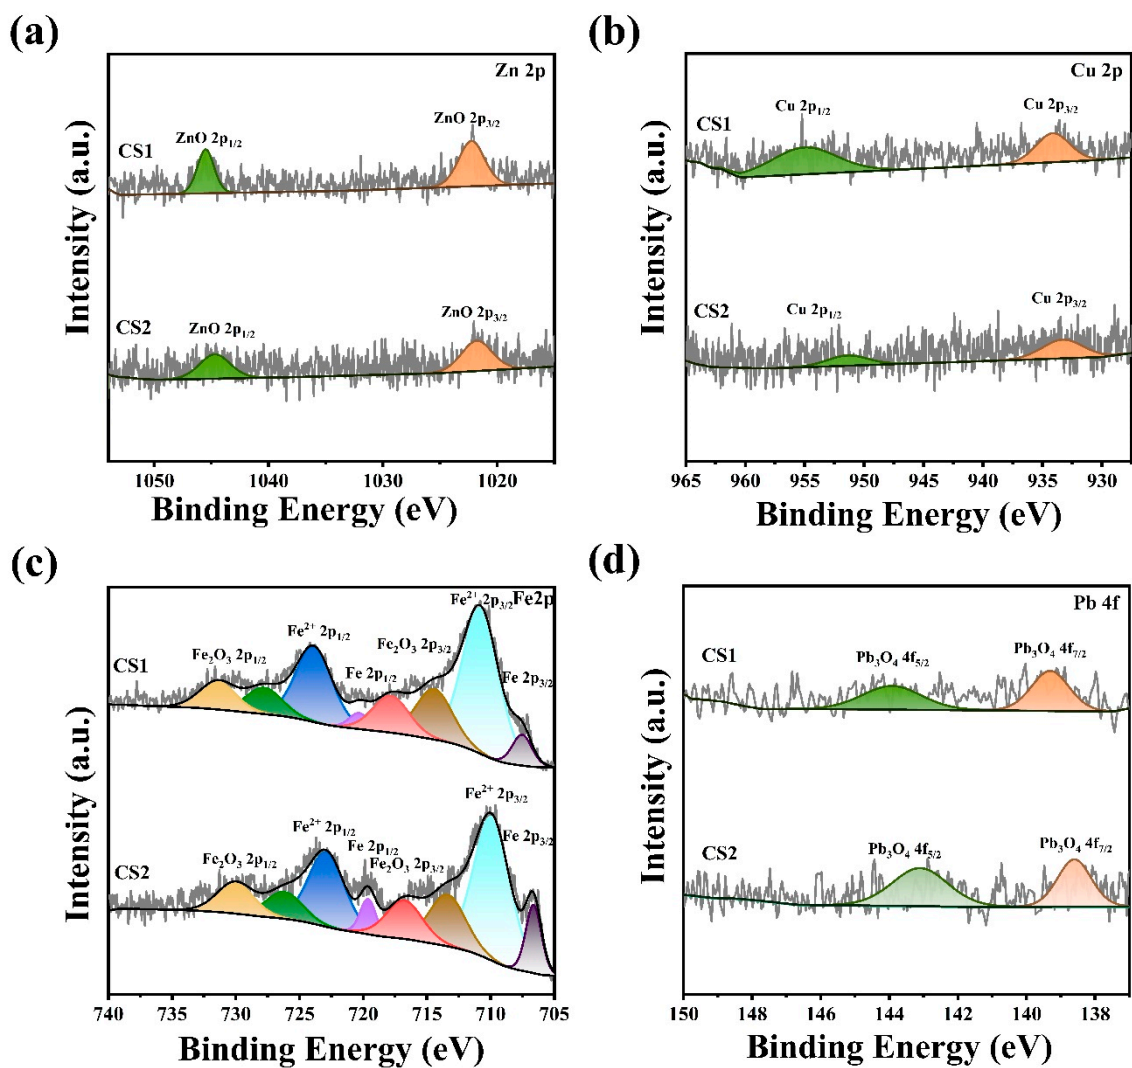

Figure S3. Fine scan XPS spectra of copper slag samples at the etching time of 200 s :

(a) Zn 2p, (b) Cu 2p, (c) Fe 2p, and (d) Pb 4f. The gray line shows the experimental values. The black line shows the fitted values of CS1 and CS2.
